# Supplementary material
Source: Springer Nature journal article supplement (https://www.springermedizin.de/resource/supplementary/12913_2010_1838_MOESM2_ESM.pdf/9529052)

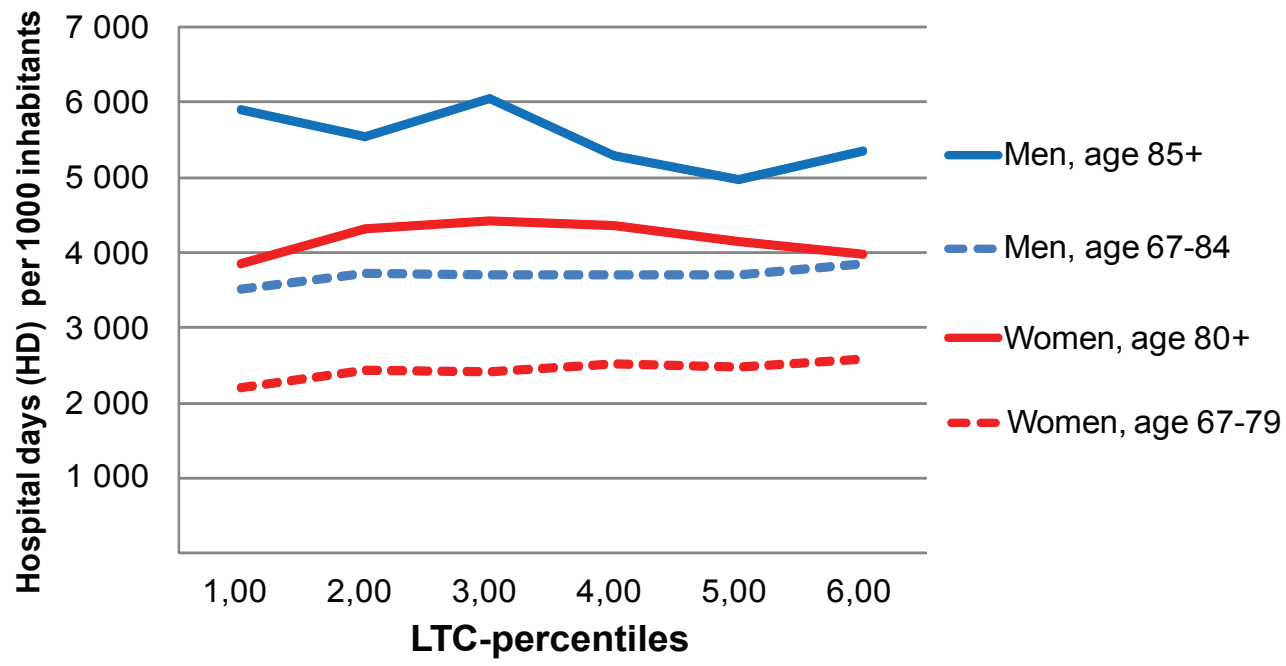

Supplement: MOESM2 [file 9529052]
